# Supplementary material
Source: publisher figshare collection journal article supplement (https://acs.figshare.com/ndownloader/files/4766992)
Supplement: Supplementary file 1 [file 4766992]

## Electronic Supporting Information (ESI)

### Chiral Magnetic Metal-Organic Frameworks of Dimetal Sub-Units: Magnetism Tuning by Mixed-Metal Compositions of the Solid Solutions

Ming-Hua Zeng,<sup>†,§</sup> Bo Wang,<sup>†</sup> Xin-Yi Wang,<sup>‡</sup> Wei-Xiong Zhang,<sup>†</sup> Xiao-Ming  
Chen,<sup>†,\*</sup> and Song Gao<sup>‡,\*</sup>

<sup>†</sup> MOE Key Laboratory of Bioinorganic and Synthetic Chemistry, School of Chemistry and Chemical Engineering, Sun Yat-Sen University, Guangzhou 510275, P. R. China.  
cxm@mail.sysu.edu.cn. Fax: Int. code +86 20 8411-2245 (X.-M. Chen)

<sup>‡</sup> Beijing National Laboratory for Molecular Sciences, State Key Laboratory of Rare-Earth Materials Chemistry and Applications, College of Chemistry and Molecular Engineering, Peking University Beijing 100871, P. R. China

<sup>§</sup>Research Institute of Bioinorganic Chemistry, Department of Chemistry and Chemical Engineering, GuangXi Normal University, Guilin 541004, P. R. China

#### Experimental Section

##### Synthesis of 1,4-di (1-imidazolylmethyl) benzene.

Although the synthesis of 1,4-dimb was previously reported, we prepared this compound in a different way. 1,4-Dichloromethylbenzene (10.20 g, 0.06 mol) was dissolved in DMSO (20.0 mL), followed by addition of KOH (10.11 g, 0.18 mol). After the mixture is stirred at 50~60°C for 2 hours, a DMSO solution (50.0 mL) of imidazole (10.50 g, 0.15 mol) was added dropwise, which was continued for ca. 1 hour. The mixture was then allowed to stir at 40~50°C until the reactant 1,4-dichloro-methylbenzene was no longer detected by TLC. Upon

removal of the solvent under reduced pressure, the crude product was obtained. After recrystallization from ethyl acetate-petroleum, pale-yellow crystals (8.29 g) of 1,4-dimb were obtained. The yield was 62.5%, mp. 86-87 °C. <sup>1</sup>H NMR (CDCl<sub>3</sub>,  $\delta$ , ppm): 5.11 (s, 4H, CH<sub>2</sub>PhCH<sub>2</sub>), 6.88 (s, 2H, imidazole-H), 7.09 (s, 2H, imidazole-H), 7.14 (s, 4H, Ph-H), 7.54 (s, 2H, 3-imidazole-H).

**Table S1.** Elemental analysis (%) For **1~6**:

|          | Calculated |      |      | Found |      |      |
|----------|------------|------|------|-------|------|------|
|          | C%         | H%   | N%   | C%    | H%   | N%   |
| <b>1</b> | 54.30      | 5.63 | 7.44 | 54.28 | 5.66 | 7.42 |
| <b>2</b> | 54.26      | 5.63 | 7.44 | 54.23 | 5.65 | 7.41 |
| <b>3</b> | 54.28      | 5.63 | 7.45 | 54.26 | 5.66 | 7.42 |
| <b>4</b> | 54.29      | 5.63 | 7.45 | 54.27 | 5.65 | 7.43 |
| <b>5</b> | 54.27      | 5.63 | 7.45 | 54.28 | 5.64 | 7.43 |
| <b>6</b> | 54.28      | 5.63 | 7.45 | 54.25 | 5.64 | 7.42 |

**Table S2.** Main IR bands (cm<sup>-1</sup>)

| <b>1</b>             | <b>2</b>             | <b>3</b>             | <b>4</b>             | <b>5</b>             | <b>6</b>            |
|----------------------|----------------------|----------------------|----------------------|----------------------|---------------------|
| 2969.0 <sub>s</sub>  | 2967.9 <sub>s</sub>  | 2967.9 <sub>s</sub>  | 2969.3 <sub>s</sub>  | 2968.3 <sub>s</sub>  | 2970 <sub>s</sub>   |
| 1598.3 <sub>vs</sub> | 1597.6 <sub>vs</sub> | 1597.6 <sub>vs</sub> | 1597.7 <sub>vs</sub> | 1597.7 <sub>vs</sub> | 1598 <sub>vs</sub>  |
| 1522.8 <sub>s</sub>  | 1520.7 <sub>s</sub>  | 1520.7 <sub>s</sub>  | 1521.7 <sub>s</sub>  | 1521.3 <sub>s</sub>  | 1441 <sub>s</sub>   |
| 1403.7 <sub>vs</sub> | 1408.3 <sub>vs</sub> | 1408.3 <sub>vs</sub> | 1404.3 <sub>vs</sub> | 1407.1 <sub>vs</sub> | 1408 <sub>vs</sub>  |
| 1289.0 <sub>m</sub>  | 1288.1 <sub>m</sub>  | 1288.1 <sub>m</sub>  | 1288.8 <sub>m</sub>  | 1288.5 <sub>m</sub>  | 1292.9 <sub>m</sub> |
| 1112.4 <sub>m</sub>  | 1111.8 <sub>m</sub>  | 1111.8 <sub>m</sub>  | 1112.0 <sub>m</sub>  | 1112.3 <sub>m</sub>  | 1114 <sub>m</sub>   |
| 804.4 <sub>m</sub>   | 804.2 <sub>m</sub>   | 804.2 <sub>m</sub>   | 804.2 <sub>m</sub>   | 804.1 <sub>m</sub>   | 802 <sub>m</sub>    |
| 756.8 <sub>m</sub>   | 756.9 <sub>m</sub>   | 756.9 <sub>m</sub>   | 757.6 <sub>m</sub>   | 757.4 <sub>m</sub>   | 759 <sub>m</sub>    |
| 656.1 <sub>m</sub>   | 655.6 <sub>m</sub>   | 655.6 <sub>m</sub>   | 655.8 <sub>m</sub>   | 656.0 <sub>m</sub>   | 658 <sub>m</sub>    |
| 517.0 <sub>w</sub>   | 512.7 <sub>w</sub>   | 512.7 <sub>w</sub>   | 515.3 <sub>w</sub>   | 513.4 <sub>w</sub>   | 516 <sub>w</sub>    |
| 480.7 <sub>w</sub>   | 481.0 <sub>w</sub>   | 481.0 <sub>w</sub>   | 480.5 <sub>w</sub>   | 481.0 <sub>w</sub>   | 482 <sub>w</sub>    |

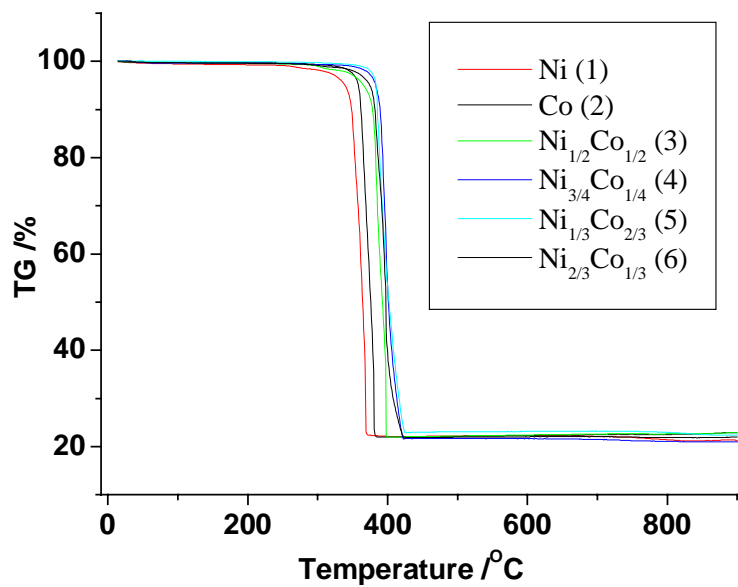

**Figure S1.** The thermal gravimetric curve of 1~6 in air.

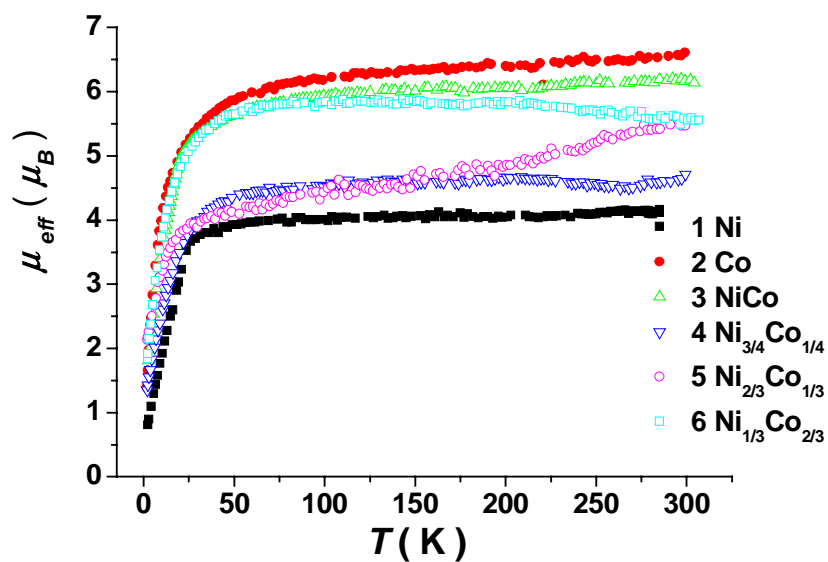

**Figure S2.**  $\mu_{\text{eff}}-T$  plots for 1 per  $\text{Ni}^{\text{II}}_2$  at 30 kOe (black), 2 per  $\text{Co}^{\text{II}}_2$  at 10 kOe (red), 3 per  $\text{CoNi}$  at 10 kOe (green), 4 per  $\text{Ni}_{3/2}\text{Co}_{1/2}$  at 30 kOe (blue), 5 per  $\text{Ni}_{4/3}\text{Co}_{2/3}$  at 20 kOe (magenta) and 6 per  $\text{Ni}_{2/3}\text{Co}_{4/3}$  at 20 kOe (cyan).

Least-squares fitting of the magnetic data for **1** and **2**:

### 1. Fitted by pure spin system (Ni<sup>2+</sup>):

The cluster Hamiltonian is given in equation as follows

$$\hat{H}_{ex} = -J\hat{S}_1\hat{S}_2$$

The magnetic susceptibility data were quantitatively analyzed by treating the Ni(II) ions as an interacting dimer (Eq. 1 and 2), where  $\chi = J/kT$ ,  $N$ ,  $J$  is intra-dimer interaction and  $zJ'$  is inter-dimer interaction,  $\beta$ ,  $g$ ,  $k$ , and  $T$  have their usual meanings.

$$\chi_{\text{dimer}} = \frac{2N\beta^2 g^2}{kT} \left[ \frac{5e^{3x} + e^x}{5e^{3x} + 3e^x + 1} \right] \quad (\text{Eq.S1})$$

$$\chi_{\text{dimer}} = \frac{\chi'_{\text{dimer}}}{1 - 2zJ'\chi'_{\text{dimer}}/N\beta^2 g^2} \quad (\text{Eq.S2})$$

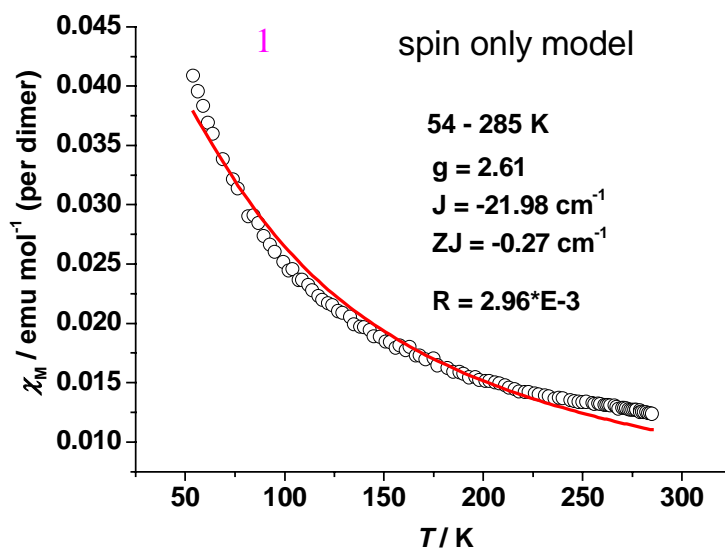

**Figure S3.** Least-squares fitting of experimental data using eq. S1 for **1**

## B. Fitted by pure spin system (Co<sup>2+</sup>):

The cluster Hamiltonian is given in equation as follows

$$\hat{H}_{ex} = -J\hat{S}_1\hat{S}_2$$

The susceptibility ( $\chi$ ) of **dimmer Co** is given as eq. 3 and 2.

$$\chi_{\text{dimer}}' = \frac{2N\beta^2 g^2}{kT} \left[ \frac{14e^{6x} + 5e^{3x} + e^x}{7e^{6x} + 5e^{3x} + 3e^x + 1} \right] \quad (3)$$

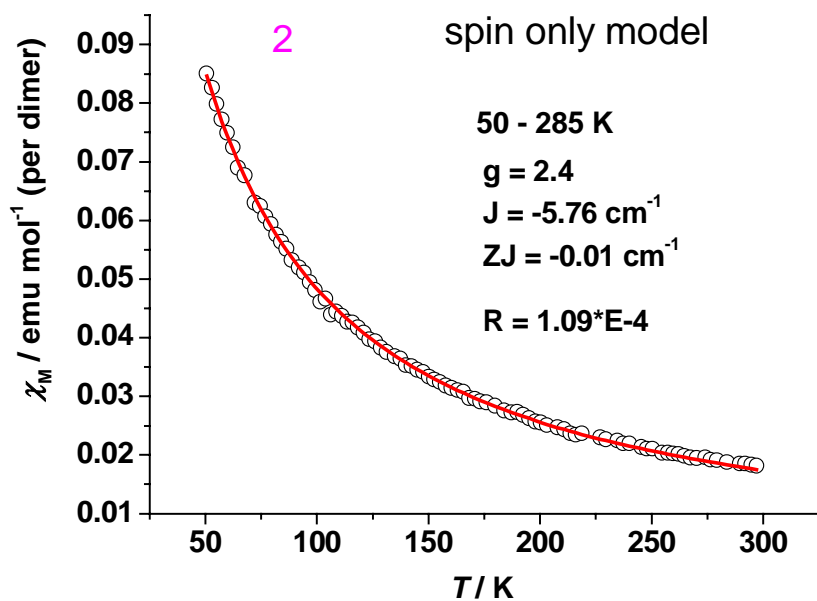

**Figure S4.** Least-squares fitting of experimental data using eq. S3 for **2**.

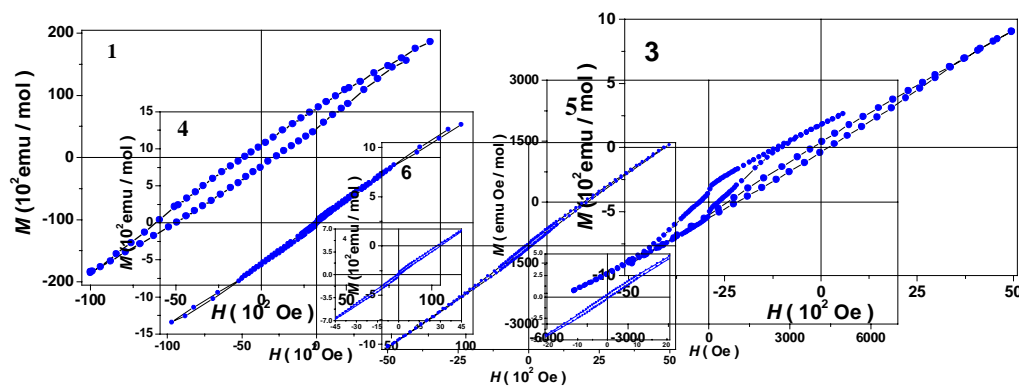

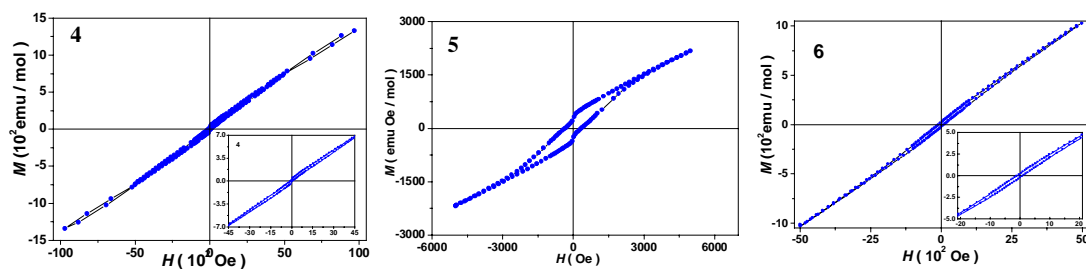

**Figure S5.** The hysteresis loops for **1**, **3** ~**6** at 1.8 K.

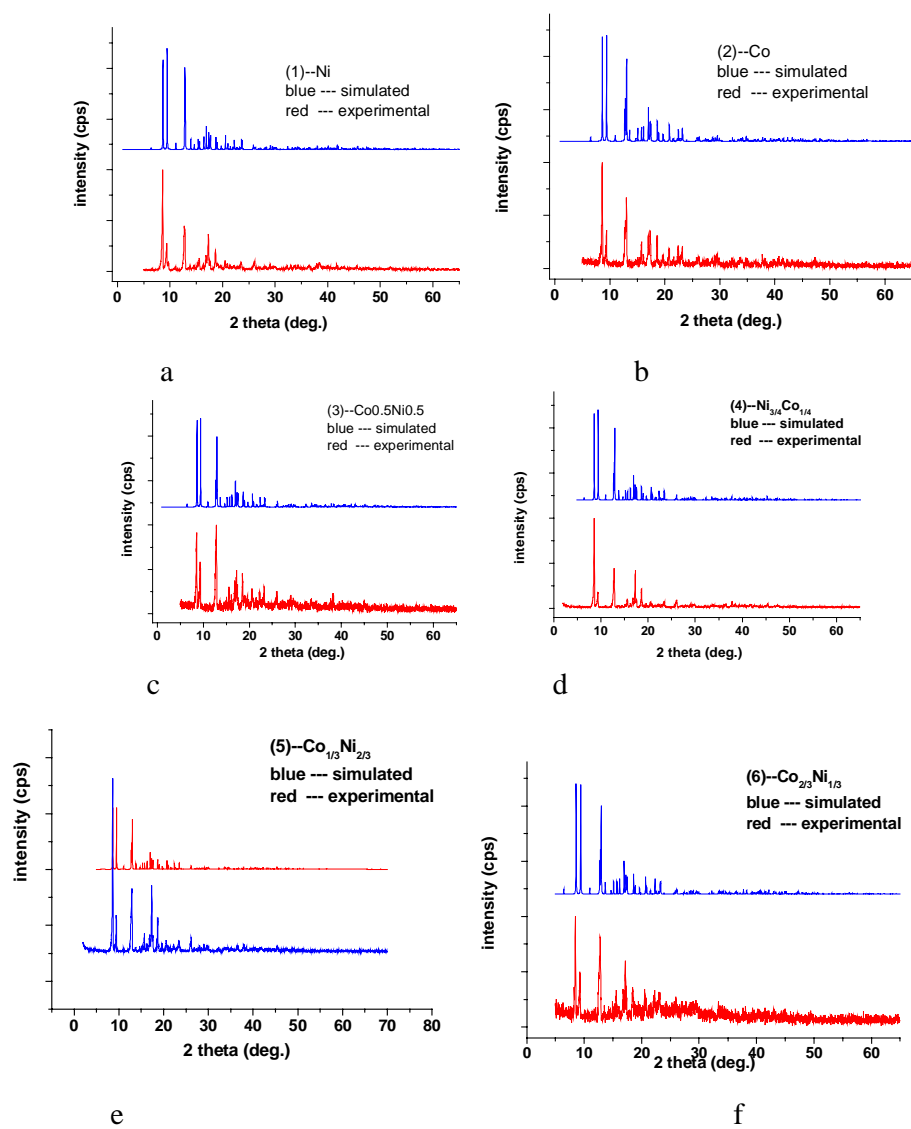

**Figure S6.** The simulated (upper) and experimental (lower) powder X-ray diffraction patterns of **1** (a), **2** (b), **3** (c), **4** (d), **5** (e) and **6** (f).
